# Supplementary material for: The influence of hardness at varying pH on zinc toxicity and lability to a freshwater microalga, Chlorella sp.
Source: Royal Society of Chemistry journal article supplement (doi:10.1039/d2em00063f), 2022-01-01
Supplement: d2em00063f1.xlsx [file d2em00063f1.xlsx]

## Sheet: Table S1
Table S1. Salt masses used for toxicity test media preparation. Salt masses are based on the 'moderately hard' (90 mg/L) receipe by USEPA (2002) with modified calcium and magnesium salt masses to alter hardness.
	Salt mass (g) required per 1 L of media prepared
Test Hardness (nominal) (mg/L)	NaHCO3	CaSO4.2H2O	MgSO4.7H2O	KCl
5	0.096	0.0036	0.0072	0.004
30	0.096	0.0212	0.0434	0.004
90	0.096	0.06	0.123	0.004
400	0.096	0.2824	0.5788	0.004

## Sheet: Table S2
Table S2. WHAM input values
Test Name	Line Number	Description	SPM	Temperature	pH	Colloidal HA	Na	Mg	K	Ca	Zn	Cl	NO3	SO4	CO3	PO4
			g/l	deg C		mg/L	mg/l	mg/l	mg/l	mg/l	µg/l	mg/l	mg/L	mg/l	mg/l	mg/L
Hardness 5 - pH 6.5	1	Control	0	27	6.7	0.754017	30	0.6	2.1	0.9	0.267611	1.9	1.5	5	68.58	0.15
Hardness 5 - pH 6.5	2	Control	0	27	6.7	0.754017	30	0.6	2.1	0.9	0.142534	1.9	1.5	5	68.58	0.15
Hardness 5 - pH 6.5	3	Control	0	27	6.7	0.754017	30	0.6	2.1	0.9	0.126851	1.9	1.5	5	68.58	0.15
Hardness 5 - pH 6.5	4	Control	0	27	6.7	0.754017	30	0.6	2.1	0.9	0.212717	1.9	1.5	5	68.58	0.15
Hardness 5 - pH 6.5	5	Control	0	27	6.7	0.754017	30	0.6	2.1	0.9	0.212717	1.9	1.5	5	68.58	0.15
Hardness 5 - pH 6.5	6	Control	0	27	6.7	0.754017	30	0.6	2.1	0.9	0.35087	1.9	1.5	5	68.58	0.15
Hardness 5 - pH 6.5	7	Control	0	27	6.7	0.754017	30	0.6	2.1	0.9	0.212717	1.9	1.5	5	68.58	0.15
Hardness 5 - pH 6.5	8	Zn1	0	27	6.7	0.754017	30	0.6	2.1	0.9	1.20085	1.9	1.5	5	68.58	0.15
Hardness 5 - pH 6.5	9	Zn1	0	27	6.7	0.754017	30	0.6	2.1	0.9	0.866738	1.9	1.5	5	68.58	0.15
Hardness 5 - pH 6.5	10	Zn1	0	27	6.7	0.754017	30	0.6	2.1	0.9	0.793559	1.9	1.5	5	68.58	0.15
Hardness 5 - pH 6.5	11	Zn1	0	27	6.7	0.754017	30	0.6	2.1	0.9	0.867425	1.9	1.5	5	68.58	0.15
Hardness 5 - pH 6.5	12	Zn3	0	27	6.7	0.754017	30	0.6	2.1	0.9	2.77559	1.9	1.5	5	68.58	0.15
Hardness 5 - pH 6.5	13	Zn3	0	27	6.7	0.754017	30	0.6	2.1	0.9	3.42933	1.9	1.5	5	68.58	0.15
Hardness 5 - pH 6.5	14	Zn3	0	27	6.7	0.754017	30	0.6	2.1	0.9	3.17323	1.9	1.5	5	68.58	0.15
Hardness 5 - pH 6.5	15	Zn3	0	27	6.7	0.754017	30	0.6	2.1	0.9	3.6763	1.9	1.5	5	68.58	0.15
Hardness 5 - pH 6.5	16	Zn5	0	27	6.7	0.754017	30	0.6	2.1	0.9	5.45998	1.9	1.5	5	68.58	0.15
Hardness 5 - pH 6.5	17	Zn5	0	27	6.7	0.754017	30	0.6	2.1	0.9	4.66998	1.9	1.5	5	68.58	0.15
Hardness 5 - pH 6.5	18	Zn5	0	27	6.7	0.754017	30	0.6	2.1	0.9	5.09941	1.9	1.5	5	68.58	0.15
Hardness 5 - pH 6.5	19	Zn5	0	27	6.7	0.754017	30	0.6	2.1	0.9	4.82036	1.9	1.5	5	68.58	0.15
Hardness 5 - pH 6.5	20	Zn7	0	27	6.7	0.754017	30	0.6	2.1	0.9	6.82111	1.9	1.5	5	68.58	0.15
Hardness 5 - pH 6.5	21	Zn7	0	27	6.7	0.754017	30	0.6	2.1	0.9	7.27349	1.9	1.5	5	68.58	0.15
Hardness 5 - pH 6.5	22	Zn10	0	27	6.7	0.754017	30	0.6	2.1	0.9	10.0327	1.9	1.5	5	68.58	0.15
Hardness 5 - pH 6.5	23	Zn10	0	27	6.7	0.754017	30	0.6	2.1	0.9	9.67431	1.9	1.5	5	68.58	0.15
Hardness 5 - pH 6.5	24	Zn10	0	27	6.7	0.754017	30	0.6	2.1	0.9	10.1174	1.9	1.5	5	68.58	0.15
Hardness 5 - pH 6.5	25	Zn10	0	27	6.7	0.754017	30	0.6	2.1	0.9	10.1756	1.9	1.5	5	68.58	0.15
Hardness 5 - pH 6.5	26	Zn15	0	27	6.7	0.754017	30	0.6	2.1	0.9	15.5374	1.9	1.5	5	68.58	0.15
Hardness 5 - pH 6.5	27	Zn15	0	27	6.7	0.754017	30	0.6	2.1	0.9	15.5538	1.9	1.5	5	68.58	0.15
Hardness 5 - pH 6.5	28	Zn20	0	27	6.7	0.754017	30	0.6	2.1	0.9	21.612	1.9	1.5	5	68.58	0.15
Hardness 5 - pH 6.5	29	Zn20	0	27	6.7	0.754017	30	0.6	2.1	0.9	19.563	1.9	1.5	5	68.58	0.15
Hardness 5 - pH 6.5	30	Zn30	0	27	6.7	0.754017	30	0.6	2.1	0.9	29.5334	1.9	1.5	5	68.58	0.15
Hardness 5 - pH 6.5	31	Zn30	0	27	6.7	0.754017	30	0.6	2.1	0.9	28.4369	1.9	1.5	5	68.58	0.15
Hardness 5 - pH 6.5	32	Zn30	0	27	6.7	0.754017	30	0.6	2.1	0.9	28.1532	1.9	1.5	5	68.58	0.15
Hardness 5 - pH 6.5	33	Zn30	0	27	6.7	0.754017	30	0.6	2.1	0.9	30.5692	1.9	1.5	5	68.58	0.15
Hardness 5 - pH 6.5	34	Zn50	0	27	6.7	0.754017	30	0.6	2.1	0.9	52.2833	1.9	1.5	5	68.58	0.15
Hardness 5 - pH 6.5	35	Zn50	0	27	6.7	0.754017	30	0.6	2.1	0.9	53.9109	1.9	1.5	5	68.58	0.15
Hardness 5 - pH 6.5	36	Zn60	0	27	6.7	0.754017	30	0.6	2.1	0.9	56.6434	1.9	1.5	5	68.58	0.15
Hardness 5 - pH 6.5	37	Zn60	0	27	6.7	0.754017	30	0.6	2.1	0.9	57.0486	1.9	1.5	5	68.58	0.15
Hardness 5 - pH 6.5	38	Zn100	0	27	6.7	0.754017	30	0.6	2.1	0.9	59.081	1.9	1.5	5	68.58	0.15
Hardness 5 - pH 6.5	39	Zn100	0	27	6.7	0.754017	30	0.6	2.1	0.9	62.8981	1.9	1.5	5	68.58	0.15
Hardness 5 - pH 6.5	40	Zn100	0	27	6.7	0.754017	30	0.6	2.1	0.9	101.809	1.9	1.5	5	68.58	0.15
Hardness 5 - pH 6.5	41	Zn100	0	27	6.7	0.754017	30	0.6	2.1	0.9	101.877	1.9	1.5	5	68.58	0.15
Hardness 5 - pH 6.5	42	Zn250	0	27	6.7	0.754017	30	0.6	2.1	0.9	112.91	1.9	1.5	5	68.58	0.15
Hardness 5 - pH 6.5	43	Zn250	0	27	6.7	0.754017	30	0.6	2.1	0.9	113.969	1.9	1.5	5	68.58	0.15
Hardness 5 - pH 6.5	44	Zn500	0	27	6.7	0.754017	30	0.6	2.1	0.9	222.967	1.9	1.5	5	68.58	0.15
Hardness 5 - pH 6.5	45	Zn500	0	27	6.7	0.754017	30	0.6	2.1	0.9	219.877	1.9	1.5	5	68.58	0.15
Hardness 5 - pH 6.5	46	Zn500	0	27	6.7	0.754017	30	0.6	2.1	0.9	409.041	1.9	1.5	5	68.58	0.15
Hardness 5 - pH 6.5	47	Zn500	0	27	6.7	0.754017	30	0.6	2.1	0.9	406.93	1.9	1.5	5	68.58	0.15
Hardness 5 - pH 6.5	48	Zn1000	0	27	6.7	0.754017	30	0.6	2.1	0.9	431.966	1.9	1.5	5	68.58	0.15
Hardness 5 - pH 6.5	49	Zn1000	0	27	6.7	0.754017	30	0.6	2.1	0.9	428.478	1.9	1.5	5	68.58	0.15
Hardness 5 - pH 6.5	50	Zn1000	0	27	6.7	0.754017	30	0.6	2.1	0.9	828.7	1.9	1.5	5	68.58	0.15
Hardness 5 - pH 6.5	51	Zn1000	0	27	6.7	0.754017	30	0.6	2.1	0.9	823.991	1.9	1.5	5	68.58	0.15
Hardness 5 - pH 6.5	52	Zn5000	0	27	6.7	0.754017	30	0.6	2.1	0.9	2331.62	1.9	1.5	5	68.58	0.15
Hardness 5 - pH 6.5	53	Zn5000	0	27	6.7	0.754017	30	0.6	2.1	0.9	2293.39	1.9	1.5	5	68.58	0.15
Hardness 5 - pH 7.5	54	Control	0	27	7.6	0.754017	30	0.6	2.1	0.9	0.528109	1.9	1.5	5	68.58	0.15
Hardness 5 - pH 7.5	55	Control	0	27	7.6	0.754017	30	0.6	2.1	0.9	0.141031	1.9	1.5	5	68.58	0.15
Hardness 5 - pH 7.5	56	Control	0	27	7.6	0.754017	30	0.6	2.1	0.9	0.159145	1.9	1.5	5	68.58	0.15
Hardness 5 - pH 7.5	57	Control	0	27	7.6	0.754017	30	0.6	2.1	0.9	0.161957	1.9	1.5	5	68.58	0.15
Hardness 5 - pH 7.5	58	Control	0	27	7.6	0.754017	30	0.6	2.1	0.9	0.161957	1.9	1.5	5	68.58	0.15
Hardness 5 - pH 7.5	59	Control	0	27	7.6	0.754017	30	0.6	2.1	0.9	0.189479	1.9	1.5	5	68.58	0.15
Hardness 5 - pH 7.5	60	Control	0	27	7.6	0.754017	30	0.6	2.1	0.9	0.189479	1.9	1.5	5	68.58	0.15
Hardness 5 - pH 7.5	61	Zn1	0	27	7.6	0.754017	30	0.6	2.1	0.9	0.92691	1.9	1.5	5	68.58	0.15
Hardness 5 - pH 7.5	62	Zn1	0	27	7.6	0.754017	30	0.6	2.1	0.9	0.825041	1.9	1.5	5	68.58	0.15
Hardness 5 - pH 7.5	63	Zn1	0	27	7.6	0.754017	30	0.6	2.1	0.9	0.712236	1.9	1.5	5	68.58	0.15
Hardness 5 - pH 7.5	64	Zn1	0	27	7.6	0.754017	30	0.6	2.1	0.9	0.736368	1.9	1.5	5	68.58	0.15
Hardness 5 - pH 7.5	65	Zn3	0	27	7.6	0.754017	30	0.6	2.1	0.9	2.24095	1.9	1.5	5	68.58	0.15
Hardness 5 - pH 7.5	66	Zn3	0	27	7.6	0.754017	30	0.6	2.1	0.9	2.37364	1.9	1.5	5	68.58	0.15
Hardness 5 - pH 7.5	67	Zn3	0	27	7.6	0.754017	30	0.6	2.1	0.9	2.07945	1.9	1.5	5	68.58	0.15
Hardness 5 - pH 7.5	68	Zn3	0	27	7.6	0.754017	30	0.6	2.1	0.9	3.31691	1.9	1.5	5	68.58	0.15
Hardness 5 - pH 7.5	69	Zn5	0	27	7.6	0.754017	30	0.6	2.1	0.9	4.07767	1.9	1.5	5	68.58	0.15
Hardness 5 - pH 7.5	70	Zn5	0	27	7.6	0.754017	30	0.6	2.1	0.9	4.66599	1.9	1.5	5	68.58	0.15
Hardness 5 - pH 7.5	71	Zn5	0	27	7.6	0.754017	30	0.6	2.1	0.9	4.2233	1.9	1.5	5	68.58	0.15
Hardness 5 - pH 7.5	72	Zn5	0	27	7.6	0.754017	30	0.6	2.1	0.9	4.24327	1.9	1.5	5	68.58	0.15
Hardness 5 - pH 7.5	73	Zn7	0	27	7.6	0.754017	30	0.6	2.1	0.9	5.84425	1.9	1.5	5	68.58	0.15
Hardness 5 - pH 7.5	74	Zn7	0	27	7.6	0.754017	30	0.6	2.1	0.9	6.71227	1.9	1.5	5	68.58	0.15
Hardness 5 - pH 7.5	75	Zn10	0	27	7.6	0.754017	30	0.6	2.1	0.9	8.82671	1.9	1.5	5	68.58	0.15
Hardness 5 - pH 7.5	76	Zn10	0	27	7.6	0.754017	30	0.6	2.1	0.9	9.38173	1.9	1.5	5	68.58	0.15
Hardness 5 - pH 7.5	77	Zn12	0	27	7.6	0.754017	30	0.6	2.1	0.9	9.6709	1.9	1.5	5	68.58	0.15
Hardness 5 - pH 7.5	78	Zn12	0	27	7.6	0.754017	30	0.6	2.1	0.9	11.2161	1.9	1.5	5	68.58	0.15
Hardness 5 - pH 7.5	79	Zn15	0	27	7.6	0.754017	30	0.6	2.1	0.9	13.2503	1.9	1.5	5	68.58	0.15
Hardness 5 - pH 7.5	80	Zn15	0	27	7.6	0.754017	30	0.6	2.1	0.9	12.3814	1.9	1.5	5	68.58	0.15
Hardness 5 - pH 7.5	81	Zn20	0	27	7.6	0.754017	30	0.6	2.1	0.9	18.2008	1.9	1.5	5	68.58	0.15
Hardness 5 - pH 7.5	82	Zn20	0	27	7.6	0.754017	30	0.6	2.1	0.9	17.2439	1.9	1.5	5	68.58	0.15
Hardness 5 - pH 7.5	83	Zn20	0	27	7.6	0.754017	30	0.6	2.1	0.9	16.2607	1.9	1.5	5	68.58	0.15
Hardness 5 - pH 7.5	84	Zn20	0	27	7.6	0.754017	30	0.6	2.1	0.9	16.8106	1.9	1.5	5	68.58	0.15
Hardness 5 - pH 7.5	85	Zn30	0	27	7.6	0.754017	30	0.6	2.1	0.9	26.3348	1.9	1.5	5	68.58	0.15
Hardness 5 - pH 7.5	86	Zn30	0	27	7.6	0.754017	30	0.6	2.1	0.9	26.6155	1.9	1.5	5	68.58	0.15
Hardness 5 - pH 7.5	87	Zn40	0	27	7.6	0.754017	30	0.6	2.1	0.9	32.9426	1.9	1.5	5	68.58	0.15
Hardness 5 - pH 7.5	88	Zn40	0	27	7.6	0.754017	30	0.6	2.1	0.9	33.9374	1.9	1.5	5	68.58	0.15
Hardness 5 - pH 7.5	89	Zn60	0	27	7.6	0.754017	30	0.6	2.1	0.9	52.759	1.9	1.5	5	68.58	0.15
Hardness 5 - pH 7.5	90	Zn60	0	27	7.6	0.754017	30	0.6	2.1	0.9	52.1262	1.9	1.5	5	68.58	0.15
Hardness 5 - pH 7.5	91	Zn90	0	27	7.6	0.754017	30	0.6	2.1	0.9	73.3534	1.9	1.5	5	68.58	0.15
Hardness 5 - pH 7.5	92	Zn90	0	27	7.6	0.754017	30	0.6	2.1	0.9	69.4223	1.9	1.5	5	68.58	0.15
Hardness 5 - pH 7.5	93	Zn100	0	27	7.6	0.754017	30	0.6	2.1	0.9	94.4681	1.9	1.5	5	68.58	0.15
Hardness 5 - pH 7.5	94	Zn100	0	27	7.6	0.754017	30	0.6	2.1	0.9	93.5806	1.9	1.5	5	68.58	0.15
Hardness 5 - pH 7.5	95	Zn150	0	27	7.6	0.754017	30	0.6	2.1	0.9	110.533	1.9	1.5	5	68.58	0.15
Hardness 5 - pH 7.5	96	Zn150	0	27	7.6	0.754017	30	0.6	2.1	0.9	109.328	1.9	1.5	5	68.58	0.15
Hardness 5 - pH 7.5	97	Zn250	0	27	7.6	0.754017	30	0.6	2.1	0.9	186.091	1.9	1.5	5	68.58	0.15
Hardness 5 - pH 7.5	98	Zn250	0	27	7.6	0.754017	30	0.6	2.1	0.9	181.721	1.9	1.5	5	68.58	0.15
Hardness 5 - pH 7.5	99	Zn250	0	27	7.6	0.754017	30	0.6	2.1	0.9	164.818	1.9	1.5	5	68.58	0.15
Hardness 5 - pH 7.5	100	Zn250	0	27	7.6	0.754017	30	0.6	2.1	0.9	162.6	1.9	1.5	5	68.58	0.15
Hardness 5 - pH 7.5	101	Zn500	0	27	7.6	0.754017	30	0.6	2.1	0.9	375.047	1.9	1.5	5	68.58	0.15
Hardness 5 - pH 7.5	102	Zn500	0	27	7.6	0.754017	30	0.6	2.1	0.9	365.924	1.9	1.5	5	68.58	0.15
Hardness 5 - pH 7.5	103	Zn1000	0	27	7.6	0.754017	30	0.6	2.1	0.9	555.154	1.9	1.5	5	68.58	0.15
Hardness 5 - pH 7.5	104	Zn1000	0	27	7.6	0.754017	30	0.6	2.1	0.9	635.102	1.9	1.5	5	68.58	0.15
Hardness 5 - pH 7.5	105	Zn5000	0	27	7.6	0.754017	30	0.6	2.1	0.9	3058.61	1.9	1.5	5	68.58	0.15
Hardness 5 - pH 7.5	106	Zn5000	0	27	7.6	0.754017	30	0.6	2.1	0.9	3852.16	1.9	1.5	5	68.58	0.15
Hardness 5 - pH 8.5	107	Control	0	27	8.3	0.754017	30	0.6	2.1	0.9	0.239396	1.9	1.5	5	68.58	0.15
Hardness 5 - pH 8.5	108	Control	0	27	8.3	0.754017	30	0.6	2.1	0.9	0.113	1.9	1.5	5	68.58	0.15
Hardness 5 - pH 8.5	109	Control	0	27	8.3	0.754017	30	0.6	2.1	0.9	0.113	1.9	1.5	5	68.58	0.15
Hardness 5 - pH 8.5	110	Control	0	27	8.3	0.754017	30	0.6	2.1	0.9	0.189717	1.9	1.5	5	68.58	0.15
Hardness 5 - pH 8.5	111	Control	0	27	8.3	0.754017	30	0.6	2.1	0.9	0.189717	1.9	1.5	5	68.58	0.15
Hardness 5 - pH 8.5	112	Control	0	27	8.3	0.754017	30	0.6	2.1	0.9	0.189717	1.9	1.5	5	68.58	0.15
Hardness 5 - pH 8.5	113	Control	0	27	8.3	0.754017	30	0.6	2.1	0.9	0.189717	1.9	1.5	5	68.58	0.15
Hardness 5 - pH 8.5	114	Zn1	0	27	8.3	0.754017	30	0.6	2.1	0.9	0.33861	1.9	1.5	5	68.58	0.15
Hardness 5 - pH 8.5	115	Zn1	0	27	8.3	0.754017	30	0.6	2.1	0.9	1.18799	1.9	1.5	5	68.58	0.15
Hardness 5 - pH 8.5	116	Zn2	0	27	8.3	0.754017	30	0.6	2.1	0.9	0.540379	1.9	1.5	5	68.58	0.15
Hardness 5 - pH 8.5	117	Zn2	0	27	8.3	0.754017	30	0.6	2.1	0.9	0.504903	1.9	1.5	5	68.58	0.15
Hardness 5 - pH 8.5	118	Zn3	0	27	8.3	0.754017	30	0.6	2.1	0.9	2.35129	1.9	1.5	5	68.58	0.15
Hardness 5 - pH 8.5	119	Zn3	0	27	8.3	0.754017	30	0.6	2.1	0.9	1.62877	1.9	1.5	5	68.58	0.15
Hardness 5 - pH 8.5	120	Zn3	0	27	8.3	0.754017	30	0.6	2.1	0.9	1.2483	1.9	1.5	5	68.58	0.15
Hardness 5 - pH 8.5	121	Zn3	0	27	8.3	0.754017	30	0.6	2.1	0.9	1.52799	1.9	1.5	5	68.58	0.15
Hardness 5 - pH 8.5	122	Zn4	0	27	8.3	0.754017	30	0.6	2.1	0.9	1.99084	1.9	1.5	5	68.58	0.15
Hardness 5 - pH 8.5	123	Zn4	0	27	8.3	0.754017	30	0.6	2.1	0.9	1.60156	1.9	1.5	5	68.58	0.15
Hardness 5 - pH 8.5	124	Zn5	0	27	8.3	0.754017	30	0.6	2.1	0.9	1.99802	1.9	1.5	5	68.58	0.15
Hardness 5 - pH 8.5	125	Zn5	0	27	8.3	0.754017	30	0.6	2.1	0.9	1.84717	1.9	1.5	5	68.58	0.15
Hardness 5 - pH 8.5	126	Zn5	0	27	8.3	0.754017	30	0.6	2.1	0.9	2.38145	1.9	1.5	5	68.58	0.15
Hardness 5 - pH 8.5	127	Zn5	0	27	8.3	0.754017	30	0.6	2.1	0.9	2.97	1.9	1.5	5	68.58	0.15
Hardness 5 - pH 8.5	128	Zn8	0	27	8.3	0.754017	30	0.6	2.1	0.9	4.54319	1.9	1.5	5	68.58	0.15
Hardness 5 - pH 8.5	129	Zn8	0	27	8.3	0.754017	30	0.6	2.1	0.9	6.01151	1.9	1.5	5	68.58	0.15
Hardness 5 - pH 8.5	130	Zn10	0	27	8.3	0.754017	30	0.6	2.1	0.9	4.37701	1.9	1.5	5	68.58	0.15
Hardness 5 - pH 8.5	131	Zn10	0	27	8.3	0.754017	30	0.6	2.1	0.9	5.50569	1.9	1.5	5	68.58	0.15
Hardness 5 - pH 8.5	132	Zn10	0	27	8.3	0.754017	30	0.6	2.1	0.9	6.07771	1.9	1.5	5	68.58	0.15
Hardness 5 - pH 8.5	133	Zn10	0	27	8.3	0.754017	30	0.6	2.1	0.9	6.41474	1.9	1.5	5	68.58	0.15
Hardness 5 - pH 8.5	134	Zn12	0	27	8.3	0.754017	30	0.6	2.1	0.9	6.48008	1.9	1.5	5	68.58	0.15
Hardness 5 - pH 8.5	135	Zn12	0	27	8.3	0.754017	30	0.6	2.1	0.9	6.62891	1.9	1.5	5	68.58	0.15
Hardness 5 - pH 8.5	136	Zn15	0	27	8.3	0.754017	30	0.6	2.1	0.9	8.79849	1.9	1.5	5	68.58	0.15
Hardness 5 - pH 8.5	137	Zn15	0	27	8.3	0.754017	30	0.6	2.1	0.9	10.9095	1.9	1.5	5	68.58	0.15
Hardness 5 - pH 8.5	138	Zn20	0	27	8.3	0.754017	30	0.6	2.1	0.9	10.8779	1.9	1.5	5	68.58	0.15
Hardness 5 - pH 8.5	139	Zn20	0	27	8.3	0.754017	30	0.6	2.1	0.9	12.2237	1.9	1.5	5	68.58	0.15
Hardness 5 - pH 8.5	140	Zn30	0	27	8.3	0.754017	30	0.6	2.1	0.9	16.2124	1.9	1.5	5	68.58	0.15
Hardness 5 - pH 8.5	141	Zn30	0	27	8.3	0.754017	30	0.6	2.1	0.9	17.8058	1.9	1.5	5	68.58	0.15
Hardness 5 - pH 8.5	142	Zn50	0	27	8.3	0.754017	30	0.6	2.1	0.9	30.062	1.9	1.5	5	68.58	0.15
Hardness 5 - pH 8.5	143	Zn50	0	27	8.3	0.754017	30	0.6	2.1	0.9	34.7181	1.9	1.5	5	68.58	0.15
Hardness 5 - pH 8.5	144	Zn60	0	27	8.3	0.754017	30	0.6	2.1	0.9	38.2313	1.9	1.5	5	68.58	0.15
Hardness 5 - pH 8.5	145	Zn60	0	27	8.3	0.754017	30	0.6	2.1	0.9	38.1554	1.9	1.5	5	68.58	0.15
Hardness 5 - pH 8.5	146	Zn100	0	27	8.3	0.754017	30	0.6	2.1	0.9	62.3743	1.9	1.5	5	68.58	0.15
Hardness 5 - pH 8.5	147	Zn100	0	27	8.3	0.754017	30	0.6	2.1	0.9	75.4449	1.9	1.5	5	68.58	0.15
Hardness 5 - pH 8.5	148	Zn100	0	27	8.3	0.754017	30	0.6	2.1	0.9	62.1175	1.9	1.5	5	68.58	0.15
Hardness 5 - pH 8.5	149	Zn100	0	27	8.3	0.754017	30	0.6	2.1	0.9	64.0556	1.9	1.5	5	68.58	0.15
Hardness 5 - pH 8.5	150	Zn200	0	27	8.3	0.754017	30	0.6	2.1	0.9	119.534	1.9	1.5	5	68.58	0.15
Hardness 5 - pH 8.5	151	Zn200	0	27	8.3	0.754017	30	0.6	2.1	0.9	120.361	1.9	1.5	5	68.58	0.15
Hardness 5 - pH 8.5	152	Zn250	0	27	8.3	0.754017	30	0.6	2.1	0.9	144.104	1.9	1.5	5	68.58	0.15
Hardness 5 - pH 8.5	153	Zn250	0	27	8.3	0.754017	30	0.6	2.1	0.9	144.705	1.9	1.5	5	68.58	0.15
Hardness 5 - pH 8.5	154	Zn500	0	27	8.3	0.754017	30	0.6	2.1	0.9	319.301	1.9	1.5	5	68.58	0.15
Hardness 5 - pH 8.5	155	Zn500	0	27	8.3	0.754017	30	0.6	2.1	0.9	301.713	1.9	1.5	5	68.58	0.15
Hardness 5 - pH 8.5	156	Zn1000	0	27	8.3	0.754017	30	0.6	2.1	0.9	557.44	1.9	1.5	5	68.58	0.15
Hardness 5 - pH 8.5	157	Zn1000	0	27	8.3	0.754017	30	0.6	2.1	0.9	544.5	1.9	1.5	5	68.58	0.15
Hardness 30 - pH 6.5	158	Control	0	27	6.7	0.496132	30	4	2.1	5	0.249411	1.9	1.5	25	68.58	0.15
Hardness 30 - pH 6.5	159	Control	0	27	6.7	0.496132	30	4	2.1	5	0.233117	1.9	1.5	25	68.58	0.15
Hardness 30 - pH 6.5	160	Control	0	27	6.7	0.496132	30	4	2.1	5	0.2085	1.9	1.5	25	68.58	0.15
Hardness 30 - pH 6.5	161	Control	0	27	6.7	0.496132	30	4	2.1	5	0.203503	1.9	1.5	25	68.58	0.15
Hardness 30 - pH 6.5	162	Control	0	27	6.7	0.496132	30	4	2.1	5	0.194292	1.9	1.5	25	68.58	0.15
Hardness 30 - pH 6.5	163	Control	0	27	6.7	0.496132	30	4	2.1	5	0.322694	1.9	1.5	25	68.58	0.15
Hardness 30 - pH 6.5	164	Zn1	0	27	6.7	0.496132	30	4	2.1	5	1.06798	1.9	1.5	25	68.58	0.15
Hardness 30 - pH 6.5	165	Zn1	0	27	6.7	0.496132	30	4	2.1	5	1.04008	1.9	1.5	25	68.58	0.15
Hardness 30 - pH 6.5	166	Zn2	0	27	6.7	0.496132	30	4	2.1	5	1.95721	1.9	1.5	25	68.58	0.15
Hardness 30 - pH 6.5	167	Zn2	0	27	6.7	0.496132	30	4	2.1	5	1.8282	1.9	1.5	25	68.58	0.15
Hardness 30 - pH 6.5	168	Zn3	0	27	6.7	0.496132	30	4	2.1	5	3.00224	1.9	1.5	25	68.58	0.15
Hardness 30 - pH 6.5	169	Zn3	0	27	6.7	0.496132	30	4	2.1	5	2.63226	1.9	1.5	25	68.58	0.15
Hardness 30 - pH 6.5	170	Zn3	0	27	6.7	0.496132	30	4	2.1	5	2.70445	1.9	1.5	25	68.58	0.15
Hardness 30 - pH 6.5	171	Zn3	0	27	6.7	0.496132	30	4	2.1	5	2.67615	1.9	1.5	25	68.58	0.15
Hardness 30 - pH 6.5	172	Zn5	0	27	6.7	0.496132	30	4	2.1	5	4.61735	1.9	1.5	25	68.58	0.15
Hardness 30 - pH 6.5	173	Zn5	0	27	6.7	0.496132	30	4	2.1	5	4.45667	1.9	1.5	25	68.58	0.15
Hardness 30 - pH 6.5	174	Zn5	0	27	6.7	0.496132	30	4	2.1	5	4.40208	1.9	1.5	25	68.58	0.15
Hardness 30 - pH 6.5	175	Zn5	0	27	6.7	0.496132	30	4	2.1	5	3.57766	1.9	1.5	25	68.58	0.15
Hardness 30 - pH 6.5	176	Zn7	0	27	6.7	0.496132	30	4	2.1	5	6.2785	1.9	1.5	25	68.58	0.15
Hardness 30 - pH 6.5	177	Zn7	0	27	6.7	0.496132	30	4	2.1	5	7.7879	1.9	1.5	25	68.58	0.15
Hardness 30 - pH 6.5	178	Zn8	0	27	6.7	0.496132	30	4	2.1	5	7.21305	1.9	1.5	25	68.58	0.15
Hardness 30 - pH 6.5	179	Zn8	0	27	6.7	0.496132	30	4	2.1	5	7.08771	1.9	1.5	25	68.58	0.15
Hardness 30 - pH 6.5	180	Zn10	0	27	6.7	0.496132	30	4	2.1	5	8.67754	1.9	1.5	25	68.58	0.15
Hardness 30 - pH 6.5	181	Zn10	0	27	6.7	0.496132	30	4	2.1	5	8.92599	1.9	1.5	25	68.58	0.15
Hardness 30 - pH 6.5	182	Zn15	0	27	6.7	0.496132	30	4	2.1	5	16.4072	1.9	1.5	25	68.58	0.15
Hardness 30 - pH 6.5	183	Zn15	0	27	6.7	0.496132	30	4	2.1	5	15.8051	1.9	1.5	25	68.58	0.15
Hardness 30 - pH 6.5	184	Zn20	0	27	6.7	0.496132	30	4	2.1	5	19.1301	1.9	1.5	25	68.58	0.15
Hardness 30 - pH 6.5	185	Zn20	0	27	6.7	0.496132	30	4	2.1	5	19.0002	1.9	1.5	25	68.58	0.15
Hardness 30 - pH 6.5	186	Zn25	0	27	6.7	0.496132	30	4	2.1	5	24.3523	1.9	1.5	25	68.58	0.15
Hardness 30 - pH 6.5	187	Zn25	0	27	6.7	0.496132	30	4	2.1	5	23.674	1.9	1.5	25	68.58	0.15
Hardness 30 - pH 6.5	188	Zn50	0	27	6.7	0.496132	30	4	2.1	5	44.8635	1.9	1.5	25	68.58	0.15
Hardness 30 - pH 6.5	189	Zn50	0	27	6.7	0.496132	30	4	2.1	5	45.0087	1.9	1.5	25	68.58	0.15
Hardness 30 - pH 6.5	190	Zn60	0	27	6.7	0.496132	30	4	2.1	5	60.433	1.9	1.5	25	68.58	0.15
Hardness 30 - pH 6.5	191	Zn60	0	27	6.7	0.496132	30	4	2.1	5	60.7937	1.9	1.5	25	68.58	0.15
Hardness 30 - pH 6.5	192	Zn100	0	27	6.7	0.496132	30	4	2.1	5	86.357	1.9	1.5	25	68.58	0.15
Hardness 30 - pH 6.5	193	Zn100	0	27	6.7	0.496132	30	4	2.1	5	86.1515	1.9	1.5	25	68.58	0.15
Hardness 30 - pH 6.5	194	Zn200	0	27	6.7	0.496132	30	4	2.1	5	189.861	1.9	1.5	25	68.58	0.15
Hardness 30 - pH 6.5	195	Zn200	0	27	6.7	0.496132	30	4	2.1	5	191.043	1.9	1.5	25	68.58	0.15
Hardness 30 - pH 6.5	196	Zn250	0	27	6.7	0.496132	30	4	2.1	5	280.941	1.9	1.5	25	68.58	0.15
Hardness 30 - pH 6.5	197	Zn250	0	27	6.7	0.496132	30	4	2.1	5	277.382	1.9	1.5	25	68.58	0.15
Hardness 30 - pH 6.5	198	Zn400	0	27	6.7	0.496132	30	4	2.1	5	374.48	1.9	1.5	25	68.58	0.15
Hardness 30 - pH 6.5	199	Zn400	0	27	6.7	0.496132	30	4	2.1	5	376.88	1.9	1.5	25	68.58	0.15
Hardness 30 - pH 6.5	200	Zn600	0	27	6.7	0.496132	30	4	2.1	5	533.899	1.9	1.5	25	68.58	0.15
Hardness 30 - pH 6.5	201	Zn600	0	27	6.7	0.496132	30	4	2.1	5	538.586	1.9	1.5	25	68.58	0.15
Hardness 30 - pH 6.5	202	Zn750	0	27	6.7	0.496132	30	4	2.1	5	816.353	1.9	1.5	25	68.58	0.15
Hardness 30 - pH 6.5	203	Zn750	0	27	6.7	0.496132	30	4	2.1	5	795.407	1.9	1.5	25	68.58	0.15
Hardness 30 - pH 6.5	204	Zn1000	0	27	6.7	0.496132	30	4	2.1	5	999.182	1.9	1.5	25	68.58	0.15
Hardness 30 - pH 6.5	205	Zn1000	0	27	6.7	0.496132	30	4	2.1	5	958.925	1.9	1.5	25	68.58	0.15
Hardness 30 - pH 6.5	206	Zn2000	0	27	6.7	0.496132	30	4	2.1	5	2055.85	1.9	1.5	25	68.58	0.15
Hardness 30 - pH 6.5	207	Zn2000	0	27	6.7	0.496132	30	4	2.1	5	1948.45	1.9	1.5	25	68.58	0.15
Hardness 30 - pH 7.5	208	Control	0	27	7.6	0.496132	30	4	2.1	5	0.155499	1.9	1.5	25	68.58	0.15
Hardness 30 - pH 7.5	209	Control	0	27	7.6	0.496132	30	4	2.1	5	0.186692	1.9	1.5	25	68.58	0.15
Hardness 30 - pH 7.5	210	Control	0	27	7.6	0.496132	30	4	2.1	5	0.113234	1.9	1.5	25	68.58	0.15
Hardness 30 - pH 7.5	211	Control	0	27	7.6	0.496132	30	4	2.1	5	0.16	1.9	1.5	25	68.58	0.15
Hardness 30 - pH 7.5	212	Control	0	27	7.6	0.496132	30	4	2.1	5	0.16	1.9	1.5	25	68.58	0.15
Hardness 30 - pH 7.5	213	Control	0	27	7.6	0.496132	30	4	2.1	5	0.16	1.9	1.5	25	68.58	0.15
Hardness 30 - pH 7.5	214	Zn1	0	27	7.6	0.496132	30	4	2.1	5	0.493591	1.9	1.5	25	68.58	0.15
Hardness 30 - pH 7.5	215	Zn1	0	27	7.6	0.496132	30	4	2.1	5	0.558977	1.9	1.5	25	68.58	0.15
Hardness 30 - pH 7.5	216	Zn2	0	27	7.6	0.496132	30	4	2.1	5	1.3408	1.9	1.5	25	68.58	0.15
Hardness 30 - pH 7.5	217	Zn2	0	27	7.6	0.496132	30	4	2.1	5	0.976995	1.9	1.5	25	68.58	0.15
Hardness 30 - pH 7.5	218	Zn3	0	27	7.6	0.496132	30	4	2.1	5	2.37905	1.9	1.5	25	68.58	0.15
Hardness 30 - pH 7.5	219	Zn3	0	27	7.6	0.496132	30	4	2.1	5	2.2572	1.9	1.5	25	68.58	0.15
Hardness 30 - pH 7.5	220	Zn3	0	27	7.6	0.496132	30	4	2.1	5	2.0805	1.9	1.5	25	68.58	0.15
Hardness 30 - pH 7.5	221	Zn3	0	27	7.6	0.496132	30	4	2.1	5	2.10767	1.9	1.5	25	68.58	0.15
Hardness 30 - pH 7.5	222	Zn5	0	27	7.6	0.496132	30	4	2.1	5	3.87464	1.9	1.5	25	68.58	0.15
Hardness 30 - pH 7.5	223	Zn5	0	27	7.6	0.496132	30	4	2.1	5	4.0787	1.9	1.5	25	68.58	0.15
Hardness 30 - pH 7.5	224	Zn5	0	27	7.6	0.496132	30	4	2.1	5	3.28205	1.9	1.5	25	68.58	0.15
Hardness 30 - pH 7.5	225	Zn5	0	27	7.6	0.496132	30	4	2.1	5	3.32344	1.9	1.5	25	68.58	0.15
Hardness 30 - pH 7.5	226	Zn7	0	27	7.6	0.496132	30	4	2.1	5	5.58735	1.9	1.5	25	68.58	0.15
Hardness 30 - pH 7.5	227	Zn7	0	27	7.6	0.496132	30	4	2.1	5	5.82498	1.9	1.5	25	68.58	0.15
Hardness 30 - pH 7.5	228	Zn8	0	27	7.6	0.496132	30	4	2.1	5	5.41536	1.9	1.5	25	68.58	0.15
Hardness 30 - pH 7.5	229	Zn8	0	27	7.6	0.496132	30	4	2.1	5	5.66642	1.9	1.5	25	68.58	0.15
Hardness 30 - pH 7.5	230	Zn10	0	27	7.6	0.496132	30	4	2.1	5	7.50963	1.9	1.5	25	68.58	0.15
Hardness 30 - pH 7.5	231	Zn10	0	27	7.6	0.496132	30	4	2.1	5	7.24483	1.9	1.5	25	68.58	0.15
Hardness 30 - pH 7.5	232	Zn15	0	27	7.6	0.496132	30	4	2.1	5	14.422	1.9	1.5	25	68.58	0.15
Hardness 30 - pH 7.5	233	Zn15	0	27	7.6	0.496132	30	4	2.1	5	14.2388	1.9	1.5	25	68.58	0.15
Hardness 30 - pH 7.5	234	Zn20	0	27	7.6	0.496132	30	4	2.1	5	16.1617	1.9	1.5	25	68.58	0.15
Hardness 30 - pH 7.5	235	Zn20	0	27	7.6	0.496132	30	4	2.1	5	15.875	1.9	1.5	25	68.58	0.15
Hardness 30 - pH 7.5	236	Zn25	0	27	7.6	0.496132	30	4	2.1	5	21.8676	1.9	1.5	25	68.58	0.15
Hardness 30 - pH 7.5	237	Zn25	0	27	7.6	0.496132	30	4	2.1	5	21.2944	1.9	1.5	25	68.58	0.15
Hardness 30 - pH 7.5	238	Zn50	0	27	7.6	0.496132	30	4	2.1	5	40.2108	1.9	1.5	25	68.58	0.15
Hardness 30 - pH 7.5	239	Zn50	0	27	7.6	0.496132	30	4	2.1	5	39.3459	1.9	1.5	25	68.58	0.15
Hardness 30 - pH 7.5	240	Zn60	0	27	7.6	0.496132	30	4	2.1	5	54.5274	1.9	1.5	25	68.58	0.15
Hardness 30 - pH 7.5	241	Zn60	0	27	7.6	0.496132	30	4	2.1	5	52.9876	1.9	1.5	25	68.58	0.15
Hardness 30 - pH 7.5	242	Zn100	0	27	7.6	0.496132	30	4	2.1	5	76.8672	1.9	1.5	25	68.58	0.15
Hardness 30 - pH 7.5	243	Zn100	0	27	7.6	0.496132	30	4	2.1	5	76.8134	1.9	1.5	25	68.58	0.15
Hardness 30 - pH 7.5	244	Zn200	0	27	7.6	0.496132	30	4	2.1	5	170.897	1.9	1.5	25	68.58	0.15
Hardness 30 - pH 7.5	245	Zn200	0	27	7.6	0.496132	30	4	2.1	5	172.718	1.9	1.5	25	68.58	0.15
Hardness 30 - pH 7.5	246	Zn250	0	27	7.6	0.496132	30	4	2.1	5	250.5	1.9	1.5	25	68.58	0.15
Hardness 30 - pH 7.5	247	Zn250	0	27	7.6	0.496132	30	4	2.1	5	253.283	1.9	1.5	25	68.58	0.15
Hardness 30 - pH 7.5	248	Zn400	0	27	7.6	0.496132	30	4	2.1	5	348.906	1.9	1.5	25	68.58	0.15
Hardness 30 - pH 7.5	249	Zn400	0	27	7.6	0.496132	30	4	2.1	5	331.236	1.9	1.5	25	68.58	0.15
Hardness 30 - pH 7.5	250	Zn600	0	27	7.6	0.496132	30	4	2.1	5	493.763	1.9	1.5	25	68.58	0.15
Hardness 30 - pH 7.5	251	Zn600	0	27	7.6	0.496132	30	4	2.1	5	499.812	1.9	1.5	25	68.58	0.15
Hardness 30 - pH 7.5	252	Zn750	0	27	7.6	0.496132	30	4	2.1	5	715.949	1.9	1.5	25	68.58	0.15
Hardness 30 - pH 7.5	253	Zn750	0	27	7.6	0.496132	30	4	2.1	5	727.083	1.9	1.5	25	68.58	0.15
Hardness 30 - pH 7.5	254	Zn1000	0	27	7.6	0.496132	30	4	2.1	5	914.147	1.9	1.5	25	68.58	0.15
Hardness 30 - pH 7.5	255	Zn1000	0	27	7.6	0.496132	30	4	2.1	5	917.945	1.9	1.5	25	68.58	0.15
Hardness 30 - pH 7.5	256	Zn2000	0	27	7.6	0.496132	30	4	2.1	5	1893.77	1.9	1.5	25	68.58	0.15
Hardness 30 - pH 7.5	257	Zn2000	0	27	7.6	0.496132	30	4	2.1	5	1905.1	1.9	1.5	25	68.58	0.15
Hardness 30 - pH 8.5	258	Control	0	27	8.3	0.496132	30	4	2.1	5	0.2785	1.9	1.5	25	68.58	0.15
Hardness 30 - pH 8.5	259	Control	0	27	8.3	0.496132	30	4	2.1	5	0.2785	1.9	1.5	25	68.58	0.15
Hardness 30 - pH 8.5	260	Control	0	27	8.3	0.496132	30	4	2.1	5	0.2785	1.9	1.5	25	68.58	0.15
Hardness 30 - pH 8.5	261	Control	0	27	8.3	0.496132	30	4	2.1	5	0.16	1.9	1.5	25	68.58	0.15
Hardness 30 - pH 8.5	262	Control	0	27	8.3	0.496132	30	4	2.1	5	0.16	1.9	1.5	25	68.58	0.15
Hardness 30 - pH 8.5	263	Control	0	27	8.3	0.496132	30	4	2.1	5	0.16	1.9	1.5	25	68.58	0.15
Hardness 30 - pH 8.5	264	Zn1	0	27	8.3	0.496132	30	4	2.1	5	0.543874	1.9	1.5	25	68.58	0.15
Hardness 30 - pH 8.5	265	Zn1	0	27	8.3	0.496132	30	4	2.1	5	0.456561	1.9	1.5	25	68.58	0.15
Hardness 30 - pH 8.5	266	Zn1	0	27	8.3	0.496132	30	4	2.1	5	0.3414	1.9	1.5	25	68.58	0.15
Hardness 30 - pH 8.5	267	Zn1	0	27	8.3	0.496132	30	4	2.1	5	0.344626	1.9	1.5	25	68.58	0.15
Hardness 30 - pH 8.5	268	Zn2	0	27	8.3	0.496132	30	4	2.1	5	0.657087	1.9	1.5	25	68.58	0.15
Hardness 30 - pH 8.5	269	Zn2	0	27	8.3	0.496132	30	4	2.1	5	0.695498	1.9	1.5	25	68.58	0.15
Hardness 30 - pH 8.5	270	Zn3	0	27	8.3	0.496132	30	4	2.1	5	0.799102	1.9	1.5	25	68.58	0.15
Hardness 30 - pH 8.5	271	Zn3	0	27	8.3	0.496132	30	4	2.1	5	1.11446	1.9	1.5	25	68.58	0.15
Hardness 30 - pH 8.5	272	Zn3	0	27	8.3	0.496132	30	4	2.1	5	1.05494	1.9	1.5	25	68.58	0.15
Hardness 30 - pH 8.5	273	Zn3	0	27	8.3	0.496132	30	4	2.1	5	1.18488	1.9	1.5	25	68.58	0.15
Hardness 30 - pH 8.5	274	Zn4	0	27	8.3	0.496132	30	4	2.1	5	1.79664	1.9	1.5	25	68.58	0.15
Hardness 30 - pH 8.5	275	Zn4	0	27	8.3	0.496132	30	4	2.1	5	1.60775	1.9	1.5	25	68.58	0.15
Hardness 30 - pH 8.5	276	Zn5	0	27	8.3	0.496132	30	4	2.1	5	1.84019	1.9	1.5	25	68.58	0.15
Hardness 30 - pH 8.5	277	Zn5	0	27	8.3	0.496132	30	4	2.1	5	2.19137	1.9	1.5	25	68.58	0.15
Hardness 30 - pH 8.5	278	Zn6	0	27	8.3	0.496132	30	4	2.1	5	3.04625	1.9	1.5	25	68.58	0.15
Hardness 30 - pH 8.5	279	Zn6	0	27	8.3	0.496132	30	4	2.1	5	2.89408	1.9	1.5	25	68.58	0.15
Hardness 30 - pH 8.5	280	Zn8	0	27	8.3	0.496132	30	4	2.1	5	4.11686	1.9	1.5	25	68.58	0.15
Hardness 30 - pH 8.5	281	Zn8	0	27	8.3	0.496132	30	4	2.1	5	3.60857	1.9	1.5	25	68.58	0.15
Hardness 30 - pH 8.5	282	Zn10	0	27	8.3	0.496132	30	4	2.1	5	5.67105	1.9	1.5	25	68.58	0.15
Hardness 30 - pH 8.5	283	Zn10	0	27	8.3	0.496132	30	4	2.1	5	5.04476	1.9	1.5	25	68.58	0.15
Hardness 30 - pH 8.5	284	Zn12	0	27	8.3	0.496132	30	4	2.1	5	5.82269	1.9	1.5	25	68.58	0.15
Hardness 30 - pH 8.5	285	Zn12	0	27	8.3	0.496132	30	4	2.1	5	5.43636	1.9	1.5	25	68.58	0.15
Hardness 30 - pH 8.5	286	Zn15	0	27	8.3	0.496132	30	4	2.1	5	9.56501	1.9	1.5	25	68.58	0.15
Hardness 30 - pH 8.5	287	Zn15	0	27	8.3	0.496132	30	4	2.1	5	10.3794	1.9	1.5	25	68.58	0.15
Hardness 30 - pH 8.5	288	Zn20	0	27	8.3	0.496132	30	4	2.1	5	15.0382	1.9	1.5	25	68.58	0.15
Hardness 30 - pH 8.5	289	Zn20	0	27	8.3	0.496132	30	4	2.1	5	13.3359	1.9	1.5	25	68.58	0.15
Hardness 30 - pH 8.5	290	Zn20	0	27	8.3	0.496132	30	4	2.1	5	12.5191	1.9	1.5	25	68.58	0.15
Hardness 30 - pH 8.5	291	Zn20	0	27	8.3	0.496132	30	4	2.1	5	10.0272	1.9	1.5	25	68.58	0.15
Hardness 30 - pH 8.5	292	Zn30	0	27	8.3	0.496132	30	4	2.1	5	21.522	1.9	1.5	25	68.58	0.15
Hardness 30 - pH 8.5	293	Zn30	0	27	8.3	0.496132	30	4	2.1	5	20.7986	1.9	1.5	25	68.58	0.15
Hardness 30 - pH 8.5	294	Zn50	0	27	8.3	0.496132	30	4	2.1	5	30.2765	1.9	1.5	25	68.58	0.15
Hardness 30 - pH 8.5	295	Zn50	0	27	8.3	0.496132	30	4	2.1	5	33.2372	1.9	1.5	25	68.58	0.15
Hardness 30 - pH 8.5	296	Zn75	0	27	8.3	0.496132	30	4	2.1	5	52.1206	1.9	1.5	25	68.58	0.15
Hardness 30 - pH 8.5	297	Zn75	0	27	8.3	0.496132	30	4	2.1	5	48.8451	1.9	1.5	25	68.58	0.15
Hardness 30 - pH 8.5	298	Zn100	0	27	8.3	0.496132	30	4	2.1	5	65.4234	1.9	1.5	25	68.58	0.15
Hardness 30 - pH 8.5	299	Zn100	0	27	8.3	0.496132	30	4	2.1	5	60.7353	1.9	1.5	25	68.58	0.15
Hardness 30 - pH 8.5	300	Zn200	0	27	8.3	0.496132	30	4	2.1	5	150.797	1.9	1.5	25	68.58	0.15
Hardness 30 - pH 8.5	301	Zn200	0	27	8.3	0.496132	30	4	2.1	5	152.392	1.9	1.5	25	68.58	0.15
Hardness 30 - pH 8.5	302	Zn250	0	27	8.3	0.496132	30	4	2.1	5	202.17	1.9	1.5	25	68.58	0.15
Hardness 30 - pH 8.5	303	Zn250	0	27	8.3	0.496132	30	4	2.1	5	194.82	1.9	1.5	25	68.58	0.15
Hardness 30 - pH 8.5	304	Zn400	0	27	8.3	0.496132	30	4	2.1	5	303.448	1.9	1.5	25	68.58	0.15
Hardness 30 - pH 8.5	305	Zn400	0	27	8.3	0.496132	30	4	2.1	5	286.287	1.9	1.5	25	68.58	0.15
Hardness 30 - pH 8.5	306	Zn600	0	27	8.3	0.496132	30	4	2.1	5	432.475	1.9	1.5	25	68.58	0.15
Hardness 30 - pH 8.5	307	Zn600	0	27	8.3	0.496132	30	4	2.1	5	435.21	1.9	1.5	25	68.58	0.15
Hardness 30 - pH 8.5	308	Zn1000	0	27	8.3	0.496132	30	4	2.1	5	715.771	1.9	1.5	25	68.58	0.15
Hardness 30 - pH 8.5	309	Zn1000	0	27	8.3	0.496132	30	4	2.1	5	685.826	1.9	1.5	25	68.58	0.15
Hardness 400 - pH 6.5	310	Control	0	27	6.7	0.494663	30	55	2.1	71	0.268763	1.9	1.5	347	68.58	0.15
Hardness 400 - pH 6.5	311	Control	0	27	6.7	0.494663	30	55	2.1	71	0.176666	1.9	1.5	347	68.58	0.15
Hardness 400 - pH 6.5	312	Control	0	27	6.7	0.494663	30	55	2.1	71	0.42932	1.9	1.5	347	68.58	0.15
Hardness 400 - pH 6.5	313	Control	0	27	6.7	0.563647	30	55	2.1	71	0.15321	1.9	1.5	347	68.58	0.15
Hardness 400 - pH 6.5	314	Control	0	27	6.7	0.563647	30	55	2.1	71	0.160807	1.9	1.5	347	68.58	0.15
Hardness 400 - pH 6.5	315	Control	0	27	6.7	0.563647	30	55	2.1	71	0.272644	1.9	1.5	347	68.58	0.15
Hardness 400 - pH 6.5	316	Zn5	0	27	6.7	0.494663	30	55	2.1	71	9.27895	1.9	1.5	347	68.58	0.15
Hardness 400 - pH 6.5	317	Zn5	0	27	6.7	0.494663	30	55	2.1	71	11.8206	1.9	1.5	347	68.58	0.15
Hardness 400 - pH 6.5	318	Zn5	0	27	6.7	0.563647	30	55	2.1	71	4.92056	1.9	1.5	347	68.58	0.15
Hardness 400 - pH 6.5	319	Zn5	0	27	6.7	0.563647	30	55	2.1	71	5.17939	1.9	1.5	347	68.58	0.15
Hardness 400 - pH 6.5	320	Zn10	0	27	6.7	0.494663	30	55	2.1	71	17.7398	1.9	1.5	347	68.58	0.15
Hardness 400 - pH 6.5	321	Zn10	0	27	6.7	0.494663	30	55	2.1	71	9.06698	1.9	1.5	347	68.58	0.15
Hardness 400 - pH 6.5	322	Zn10	0	27	6.7	0.563647	30	55	2.1	71	10.7647	1.9	1.5	347	68.58	0.15
Hardness 400 - pH 6.5	323	Zn10	0	27	6.7	0.563647	30	55	2.1	71	9.74565	1.9	1.5	347	68.58	0.15
Hardness 400 - pH 6.5	324	Zn20	0	27	6.7	0.563647	30	55	2.1	71	19.6864	1.9	1.5	347	68.58	0.15
Hardness 400 - pH 6.5	325	Zn20	0	27	6.7	0.563647	30	55	2.1	71	18.5282	1.9	1.5	347	68.58	0.15
Hardness 400 - pH 6.5	326	Zn30	0	27	6.7	0.494663	30	55	2.1	71	38.3347	1.9	1.5	347	68.58	0.15
Hardness 400 - pH 6.5	327	Zn30	0	27	6.7	0.494663	30	55	2.1	71	31.2053	1.9	1.5	347	68.58	0.15
Hardness 400 - pH 6.5	328	Zn40	0	27	6.7	0.563647	30	55	2.1	71	36.8533	1.9	1.5	347	68.58	0.15
Hardness 400 - pH 6.5	329	Zn40	0	27	6.7	0.563647	30	55	2.1	71	36.3834	1.9	1.5	347	68.58	0.15
Hardness 400 - pH 6.5	330	Zn50	0	27	6.7	0.494663	30	55	2.1	71	46.2672	1.9	1.5	347	68.58	0.15
Hardness 400 - pH 6.5	331	Zn50	0	27	6.7	0.494663	30	55	2.1	71	49.4428	1.9	1.5	347	68.58	0.15
Hardness 400 - pH 6.5	332	Zn60	0	27	6.7	0.563647	30	55	2.1	71	60.5458	1.9	1.5	347	68.58	0.15
Hardness 400 - pH 6.5	333	Zn60	0	27	6.7	0.563647	30	55	2.1	71	61.0952	1.9	1.5	347	68.58	0.15
Hardness 400 - pH 6.5	334	Zn80	0	27	6.7	0.563647	30	55	2.1	71	78.3105	1.9	1.5	347	68.58	0.15
Hardness 400 - pH 6.5	335	Zn80	0	27	6.7	0.563647	30	55	2.1	71	77.2187	1.9	1.5	347	68.58	0.15
Hardness 400 - pH 6.5	336	Zn100	0	27	6.7	0.494663	30	55	2.1	71	105.349	1.9	1.5	347	68.58	0.15
Hardness 400 - pH 6.5	337	Zn100	0	27	6.7	0.494663	30	55	2.1	71	102.657	1.9	1.5	347	68.58	0.15
Hardness 400 - pH 6.5	338	Zn100	0	27	6.7	0.563647	30	55	2.1	71	104.198	1.9	1.5	347	68.58	0.15
Hardness 400 - pH 6.5	339	Zn100	0	27	6.7	0.563647	30	55	2.1	71	100.567	1.9	1.5	347	68.58	0.15
Hardness 400 - pH 6.5	340	Zn250	0	27	6.7	0.494663	30	55	2.1	71	216.292	1.9	1.5	347	68.58	0.15
Hardness 400 - pH 6.5	341	Zn250	0	27	6.7	0.494663	30	55	2.1	71	225.539	1.9	1.5	347	68.58	0.15
Hardness 400 - pH 6.5	342	Zn400	0	27	6.7	0.563647	30	55	2.1	71	356.842	1.9	1.5	347	68.58	0.15
Hardness 400 - pH 6.5	343	Zn400	0	27	6.7	0.563647	30	55	2.1	71	358.157	1.9	1.5	347	68.58	0.15
Hardness 400 - pH 6.5	344	Zn500	0	27	6.7	0.494663	30	55	2.1	71	452.344	1.9	1.5	347	68.58	0.15
Hardness 400 - pH 6.5	345	Zn500	0	27	6.7	0.494663	30	55	2.1	71	442.594	1.9	1.5	347	68.58	0.15
Hardness 400 - pH 6.5	346	Zn750	0	27	6.7	0.494663	30	55	2.1	71	672.267	1.9	1.5	347	68.58	0.15
Hardness 400 - pH 6.5	347	Zn750	0	27	6.7	0.494663	30	55	2.1	71	669.067	1.9	1.5	347	68.58	0.15
Hardness 400 - pH 6.5	348	Zn1000	0	27	6.7	0.494663	30	55	2.1	71	910.109	1.9	1.5	347	68.58	0.15
Hardness 400 - pH 6.5	349	Zn1000	0	27	6.7	0.494663	30	55	2.1	71	878.497	1.9	1.5	347	68.58	0.15
Hardness 400 - pH 6.5	350	Zn1000	0	27	6.7	0.563647	30	55	2.1	71	880.256	1.9	1.5	347	68.58	0.15
Hardness 400 - pH 6.5	351	Zn1000	0	27	6.7	0.563647	30	55	2.1	71	874.542	1.9	1.5	347	68.58	0.15
Hardness 400 - pH 6.5	352	Zn2000	0	27	6.7	0.494663	30	55	2.1	71	1769.04	1.9	1.5	347	68.58	0.15
Hardness 400 - pH 6.5	353	Zn2000	0	27	6.7	0.494663	30	55	2.1	71	1759.97	1.9	1.5	347	68.58	0.15
Hardness 400 - pH 6.5	354	Zn2000	0	27	6.7	0.563647	30	55	2.1	71	1810.69	1.9	1.5	347	68.58	0.15
Hardness 400 - pH 6.5	355	Zn2000	0	27	6.7	0.563647	30	55	2.1	71	1821.6	1.9	1.5	347	68.58	0.15
Hardness 400 - pH 6.5	356	Zn5000	0	27	6.7	0.494663	30	55	2.1	71	5029.68	1.9	1.5	347	68.58	0.15
Hardness 400 - pH 6.5	357	Zn5000	0	27	6.7	0.494663	30	55	2.1	71	4836	1.9	1.5	347	68.58	0.15
Hardness 400 - pH 6.5	358	Zn5000	0	27	6.7	0.563647	30	55	2.1	71	2270.2	1.9	1.5	347	68.58	0.15
Hardness 400 - pH 6.5	359	Zn5000	0	27	6.7	0.563647	30	55	2.1	71	2264.78	1.9	1.5	347	68.58	0.15
Hardness 400 - pH 7.5	360	Control	0	27	7.6	0.494663	30	55	2.1	71	0.198272	1.9	1.5	347	68.58	0.15
Hardness 400 - pH 7.5	361	Control	0	27	7.6	0.494663	30	55	2.1	71	0.20462	1.9	1.5	347	68.58	0.15
Hardness 400 - pH 7.5	362	Control	0	27	7.6	0.494663	30	55	2.1	71	0.753732	1.9	1.5	347	68.58	0.15
Hardness 400 - pH 7.5	363	Control	0	27	7.6	0.563647	30	55	2.1	71	0.144607	1.9	1.5	347	68.58	0.15
Hardness 400 - pH 7.5	364	Control	0	27	7.6	0.563647	30	55	2.1	71	0.271393	1.9	1.5	347	68.58	0.15
Hardness 400 - pH 7.5	365	Control	0	27	7.6	0.563647	30	55	2.1	71	0.197494	1.9	1.5	347	68.58	0.15
Hardness 400 - pH 7.5	366	Zn5	0	27	7.6	0.494663	30	55	2.1	71	5.30413	1.9	1.5	347	68.58	0.15
Hardness 400 - pH 7.5	367	Zn5	0	27	7.6	0.494663	30	55	2.1	71	6.05617	1.9	1.5	347	68.58	0.15
Hardness 400 - pH 7.5	368	Zn5	0	27	7.6	0.563647	30	55	2.1	71	4.53818	1.9	1.5	347	68.58	0.15
Hardness 400 - pH 7.5	369	Zn5	0	27	7.6	0.563647	30	55	2.1	71	4.81432	1.9	1.5	347	68.58	0.15
Hardness 400 - pH 7.5	370	Zn10	0	27	7.6	0.494663	30	55	2.1	71	8.94775	1.9	1.5	347	68.58	0.15
Hardness 400 - pH 7.5	371	Zn10	0	27	7.6	0.494663	30	55	2.1	71	8.91263	1.9	1.5	347	68.58	0.15
Hardness 400 - pH 7.5	372	Zn10	0	27	7.6	0.563647	30	55	2.1	71	9.08043	1.9	1.5	347	68.58	0.15
Hardness 400 - pH 7.5	373	Zn10	0	27	7.6	0.563647	30	55	2.1	71	8.98337	1.9	1.5	347	68.58	0.15
Hardness 400 - pH 7.5	374	Zn20	0	27	7.6	0.563647	30	55	2.1	71	16.639	1.9	1.5	347	68.58	0.15
Hardness 400 - pH 7.5	375	Zn20	0	27	7.6	0.563647	30	55	2.1	71	16.3292	1.9	1.5	347	68.58	0.15
Hardness 400 - pH 7.5	376	Zn30	0	27	7.6	0.494663	30	55	2.1	71	26.3209	1.9	1.5	347	68.58	0.15
Hardness 400 - pH 7.5	377	Zn30	0	27	7.6	0.494663	30	55	2.1	71	25.2536	1.9	1.5	347	68.58	0.15
Hardness 400 - pH 7.5	378	Zn40	0	27	7.6	0.563647	30	55	2.1	71	33.036	1.9	1.5	347	68.58	0.15
Hardness 400 - pH 7.5	379	Zn40	0	27	7.6	0.563647	30	55	2.1	71	32.8542	1.9	1.5	347	68.58	0.15
Hardness 400 - pH 7.5	380	Zn50	0	27	7.6	0.494663	30	55	2.1	71	43.346	1.9	1.5	347	68.58	0.15
Hardness 400 - pH 7.5	381	Zn50	0	27	7.6	0.494663	30	55	2.1	71	43.8193	1.9	1.5	347	68.58	0.15
Hardness 400 - pH 7.5	382	Zn60	0	27	7.6	0.563647	30	55	2.1	71	57.2035	1.9	1.5	347	68.58	0.15
Hardness 400 - pH 7.5	383	Zn60	0	27	7.6	0.563647	30	55	2.1	71	55.3361	1.9	1.5	347	68.58	0.15
Hardness 400 - pH 7.5	384	Zn80	0	27	7.6	0.563647	30	55	2.1	71	73.5519	1.9	1.5	347	68.58	0.15
Hardness 400 - pH 7.5	385	Zn80	0	27	7.6	0.563647	30	55	2.1	71	69.5938	1.9	1.5	347	68.58	0.15
Hardness 400 - pH 7.5	386	Zn100	0	27	7.6	0.494663	30	55	2.1	71	92.3288	1.9	1.5	347	68.58	0.15
Hardness 400 - pH 7.5	387	Zn100	0	27	7.6	0.494663	30	55	2.1	71	87.9083	1.9	1.5	347	68.58	0.15
Hardness 400 - pH 7.5	388	Zn100	0	27	7.6	0.563647	30	55	2.1	71	98.5383	1.9	1.5	347	68.58	0.15
Hardness 400 - pH 7.5	389	Zn100	0	27	7.6	0.563647	30	55	2.1	71	94.2596	1.9	1.5	347	68.58	0.15
Hardness 400 - pH 7.5	390	Zn250	0	27	7.6	0.494663	30	55	2.1	71	206.571	1.9	1.5	347	68.58	0.15
Hardness 400 - pH 7.5	391	Zn250	0	27	7.6	0.494663	30	55	2.1	71	201.326	1.9	1.5	347	68.58	0.15
Hardness 400 - pH 7.5	392	Zn400	0	27	7.6	0.563647	30	55	2.1	71	345.148	1.9	1.5	347	68.58	0.15
Hardness 400 - pH 7.5	393	Zn400	0	27	7.6	0.563647	30	55	2.1	71	344.012	1.9	1.5	347	68.58	0.15
Hardness 400 - pH 7.5	394	Zn500	0	27	7.6	0.494663	30	55	2.1	71	422.005	1.9	1.5	347	68.58	0.15
Hardness 400 - pH 7.5	395	Zn500	0	27	7.6	0.494663	30	55	2.1	71	416.904	1.9	1.5	347	68.58	0.15
Hardness 400 - pH 7.5	396	Zn750	0	27	7.6	0.494663	30	55	2.1	71	638.171	1.9	1.5	347	68.58	0.15
Hardness 400 - pH 7.5	397	Zn750	0	27	7.6	0.494663	30	55	2.1	71	628.874	1.9	1.5	347	68.58	0.15
Hardness 400 - pH 7.5	398	Zn1000	0	27	7.6	0.494663	30	55	2.1	71	858.142	1.9	1.5	347	68.58	0.15
Hardness 400 - pH 7.5	399	Zn1000	0	27	7.6	0.494663	30	55	2.1	71	810.379	1.9	1.5	347	68.58	0.15
Hardness 400 - pH 7.5	400	Zn1000	0	27	7.6	0.563647	30	55	2.1	71	858.086	1.9	1.5	347	68.58	0.15
Hardness 400 - pH 7.5	401	Zn1000	0	27	7.6	0.563647	30	55	2.1	71	865.092	1.9	1.5	347	68.58	0.15
Hardness 400 - pH 7.5	402	Zn2000	0	27	7.6	0.494663	30	55	2.1	71	1696.26	1.9	1.5	347	68.58	0.15
Hardness 400 - pH 7.5	403	Zn2000	0	27	7.6	0.494663	30	55	2.1	71	1641.9	1.9	1.5	347	68.58	0.15
Hardness 400 - pH 7.5	404	Zn2000	0	27	7.6	0.563647	30	55	2.1	71	1745.26	1.9	1.5	347	68.58	0.15
Hardness 400 - pH 7.5	405	Zn2000	0	27	7.6	0.563647	30	55	2.1	71	1724.32	1.9	1.5	347	68.58	0.15
Hardness 400 - pH 7.5	406	Zn5000	0	27	7.6	0.494663	30	55	2.1	71	4592.07	1.9	1.5	347	68.58	0.15
Hardness 400 - pH 7.5	407	Zn5000	0	27	7.6	0.494663	30	55	2.1	71	4582.05	1.9	1.5	347	68.58	0.15
Hardness 400 - pH 7.5	408	Zn5000	0	27	7.6	0.563647	30	55	2.1	71	2252.05	1.9	1.5	347	68.58	0.15
Hardness 400 - pH 7.5	409	Zn5000	0	27	7.6	0.563647	30	55	2.1	71	2214.57	1.9	1.5	347	68.58	0.15
Hardness 400 - pH 8.5	410	Control	0	27	8.3	0.494663	30	55	2.1	71	0.192389	1.9	1.5	347	68.58	0.15
Hardness 400 - pH 8.5	411	Control	0	27	8.3	0.494663	30	55	2.1	71	0.14	1.9	1.5	347	68.58	0.15
Hardness 400 - pH 8.5	412	Control	0	27	8.3	0.494663	30	55	2.1	71	0.14	1.9	1.5	347	68.58	0.15
Hardness 400 - pH 8.5	413	Control	0	27	8.3	0.563647	30	55	2.1	71	0.227092	1.9	1.5	347	68.58	0.15
Hardness 400 - pH 8.5	414	Control	0	27	8.3	0.563647	30	55	2.1	71	0.14	1.9	1.5	347	68.58	0.15
Hardness 400 - pH 8.5	415	Control	0	27	8.3	0.563647	30	55	2.1	71	0.14	1.9	1.5	347	68.58	0.15
Hardness 400 - pH 8.5	416	Zn0	0	27	8.3	0.563647	30	55	2.1	71	0.547314	1.9	1.5	347	68.58	0.15
Hardness 400 - pH 8.5	417	Zn0	0	27	8.3	0.563647	30	55	2.1	71	0.158773	1.9	1.5	347	68.58	0.15
Hardness 400 - pH 8.5	418	Zn1	0	27	8.3	0.563647	30	55	2.1	71	0.428131	1.9	1.5	347	68.58	0.15
Hardness 400 - pH 8.5	419	Zn1	0	27	8.3	0.563647	30	55	2.1	71	0.360391	1.9	1.5	347	68.58	0.15
Hardness 400 - pH 8.5	420	Zn3	0	27	8.3	0.563647	30	55	2.1	71	1.36077	1.9	1.5	347	68.58	0.15
Hardness 400 - pH 8.5	421	Zn3	0	27	8.3	0.563647	30	55	2.1	71	1.33795	1.9	1.5	347	68.58	0.15
Hardness 400 - pH 8.5	422	Zn5	0	27	8.3	0.494663	30	55	2.1	71	3.31945	1.9	1.5	347	68.58	0.15
Hardness 400 - pH 8.5	423	Zn5	0	27	8.3	0.494663	30	55	2.1	71	2.91355	1.9	1.5	347	68.58	0.15
Hardness 400 - pH 8.5	424	Zn5	0	27	8.3	0.563647	30	55	2.1	71	2.7921	1.9	1.5	347	68.58	0.15
Hardness 400 - pH 8.5	425	Zn5	0	27	8.3	0.563647	30	55	2.1	71	2.91663	1.9	1.5	347	68.58	0.15
Hardness 400 - pH 8.5	426	Zn10	0	27	8.3	0.494663	30	55	2.1	71	6.01877	1.9	1.5	347	68.58	0.15
Hardness 400 - pH 8.5	427	Zn10	0	27	8.3	0.494663	30	55	2.1	71	5.5324	1.9	1.5	347	68.58	0.15
Hardness 400 - pH 8.5	428	Zn10	0	27	8.3	0.563647	30	55	2.1	71	5.91508	1.9	1.5	347	68.58	0.15
Hardness 400 - pH 8.5	429	Zn10	0	27	8.3	0.563647	30	55	2.1	71	5.93957	1.9	1.5	347	68.58	0.15
Hardness 400 - pH 8.5	430	Zn20	0	27	8.3	0.563647	30	55	2.1	71	11.5338	1.9	1.5	347	68.58	0.15
Hardness 400 - pH 8.5	431	Zn20	0	27	8.3	0.563647	30	55	2.1	71	11.8544	1.9	1.5	347	68.58	0.15
Hardness 400 - pH 8.5	432	Zn30	0	27	8.3	0.494663	30	55	2.1	71	20.6288	1.9	1.5	347	68.58	0.15
Hardness 400 - pH 8.5	433	Zn30	0	27	8.3	0.494663	30	55	2.1	71	19.7882	1.9	1.5	347	68.58	0.15
Hardness 400 - pH 8.5	434	Zn40	0	27	8.3	0.563647	30	55	2.1	71	26.4145	1.9	1.5	347	68.58	0.15
Hardness 400 - pH 8.5	435	Zn40	0	27	8.3	0.563647	30	55	2.1	71	26.4826	1.9	1.5	347	68.58	0.15
Hardness 400 - pH 8.5	436	Zn50	0	27	8.3	0.494663	30	55	2.1	71	32.7773	1.9	1.5	347	68.58	0.15
Hardness 400 - pH 8.5	437	Zn50	0	27	8.3	0.494663	30	55	2.1	71	30.6385	1.9	1.5	347	68.58	0.15
Hardness 400 - pH 8.5	438	Zn60	0	27	8.3	0.563647	30	55	2.1	71	45.6983	1.9	1.5	347	68.58	0.15
Hardness 400 - pH 8.5	439	Zn60	0	27	8.3	0.563647	30	55	2.1	71	45.438	1.9	1.5	347	68.58	0.15
Hardness 400 - pH 8.5	440	Zn90	0	27	8.3	0.563647	30	55	2.1	71	59.9804	1.9	1.5	347	68.58	0.15
Hardness 400 - pH 8.5	441	Zn90	0	27	8.3	0.563647	30	55	2.1	71	60.3778	1.9	1.5	347	68.58	0.15
Hardness 400 - pH 8.5	442	Zn100	0	27	8.3	0.494663	30	55	2.1	71	71.7639	1.9	1.5	347	68.58	0.15
Hardness 400 - pH 8.5	443	Zn100	0	27	8.3	0.494663	30	55	2.1	71	66.6399	1.9	1.5	347	68.58	0.15
Hardness 400 - pH 8.5	444	Zn150	0	27	8.3	0.563647	30	55	2.1	71	112.192	1.9	1.5	347	68.58	0.15
Hardness 400 - pH 8.5	445	Zn150	0	27	8.3	0.563647	30	55	2.1	71	111.234	1.9	1.5	347	68.58	0.15
Hardness 400 - pH 8.5	446	Zn250	0	27	8.3	0.494663	30	55	2.1	71	165.047	1.9	1.5	347	68.58	0.15
Hardness 400 - pH 8.5	447	Zn250	0	27	8.3	0.494663	30	55	2.1	71	158.382	1.9	1.5	347	68.58	0.15
Hardness 400 - pH 8.5	448	Zn400	0	27	8.3	0.563647	30	55	2.1	71	304.742	1.9	1.5	347	68.58	0.15
Hardness 400 - pH 8.5	449	Zn400	0	27	8.3	0.563647	30	55	2.1	71	294.962	1.9	1.5	347	68.58	0.15
Hardness 400 - pH 8.5	450	Zn500	0	27	8.3	0.494663	30	55	2.1	71	343.24	1.9	1.5	347	68.58	0.15
Hardness 400 - pH 8.5	451	Zn500	0	27	8.3	0.494663	30	55	2.1	71	320.083	1.9	1.5	347	68.58	0.15
Hardness 400 - pH 8.5	452	Zn750	0	27	8.3	0.494663	30	55	2.1	71	513.891	1.9	1.5	347	68.58	0.15
Hardness 400 - pH 8.5	453	Zn750	0	27	8.3	0.494663	30	55	2.1	71	489.218	1.9	1.5	347	68.58	0.15
Hardness 400 - pH 8.5	454	Zn1000	0	27	8.3	0.494663	30	55	2.1	71	715.331	1.9	1.5	347	68.58	0.15
Hardness 400 - pH 8.5	455	Zn1000	0	27	8.3	0.494663	30	55	2.1	71	689.189	1.9	1.5	347	68.58	0.15
Hardness 400 - pH 8.5	456	Zn2000	0	27	8.3	0.494663	30	55	2.1	71	1430.14	1.9	1.5	347	68.58	0.15
Hardness 400 - pH 8.5	457	Zn2000	0	27	8.3	0.494663	30	55	2.1	71	1475.2	1.9	1.5	347	68.58	0.15
Hardness 400 - pH 8.5	458	Zn5000	0	27	8.3	0.494663	30	55	2.1	71	4086.03	1.9	1.5	347	68.58	0.15
Hardness 400 - pH 8.5	459	Zn5000	0	27	8.3	0.494663	30	55	2.1	71	3946.74	1.9	1.5	347	68.58	0.15

## Sheet: Table S3
Table S3. Concentration-response model parameters
			Parameters
			b (slope)						e (model inflection)
Test Name	Data points	Model type	Estimate	Standard Error	t-value	p-value	c (lower limit)	d (upper limit) fixed	Estimate	Standard Error	t-value	p-value	Residual standard error	Degrees of freedom
Hardness 5 - pH 6.5	53	Weibull (type 2)	-0.689312	0.062033	-11.112	3.122e-15	0	100	5.11389	0.504915	10.128	8.344e-14	9.87821	51
Hardness 5 - pH 7.5	53	Weibull (type 2)	-0.543831	0.052331	-10.3921	3.419e-14	0	100	8.51597	1.11409	7.6438	5.255e-10	12.3011	51
Hardness 5 - pH 8.5	51	Weibull (type 2)	-0.605229	0.039492	-15.325	< 2.2e-16	0	100	3.39148	0.266324	12.734	< 2.2e-16	7.85553	49
Hardness 30 - pH 6.5	50	Weibull (type 2)	-0.569243	0.049888	-11.4105	2.859e-15	6.88435	100	13.6086	1.55706	8.7399	1.717e-11	10.1024	48
Hardness 30 - pH 7.5	50	Weibull (type 2)	-0.438832	0.030147	-14.5566	< 2.2e-16	0	100	13.9606	1.67106	8.3543	6.452e-11	9.24798	48
Hardness 30 - pH 8.5	52	Weibull (type 2)	-0.537896	0.031333	-17.167	< 2.2e-16	0	100	6.3581	0.52397	12.134	< 2.2e-16	7.22026	50
Hardness 90 - pH 6.5	107	Weibull (type 2)	-0.32392	0.02124	-15.2501	< 2.2e-16	0	100	59.5443	5.9824	9.9532	< 2.2e-16	10.2226	105
Hardness 90 - pH 7.5	69	Weibull (type 1)	0.375325	0.013761	27.275	< 2.2e-16	0	100	317.825	24.0499	13.215	< 2.2e-16	5.24708	64
Hardness 90 - pH 8.5	111	Weibull (type 1)	0.672187	0.020858	32.227	< 2.2e-16	0	100	90.9772	3.34601	27.19	< 2.2e-16	5.15317	108
Hardness 400 - pH 6.5	50	Weibull (type 2)	-0.528564	0.037538	-14.081	<2.2e-16	22.0812	100	20.6063	1.49415	13.791	<2.2e-16	3.23217	47
Hardness 400 - pH 7.5	50	Weibull (type 2)	-0.333941	0.028553	-11.6955	1.255e-15	0	100	53.0818	8.43599	6.2923	8.954e-08	10.3951	48
Hardness 400 - pH 8.5	50	Weibull (type 1)	0.692353	0.042067	16.458	<2.2e-16	0	100	99.3623	6.67477	14.886	<2.2e-16	6.7219	48

## Sheet: Table S4
Table S4. The physicochemical characteristics of each treatment water.
Data were pooled across the number of repeated tests (n) and means of pooled data are shown. Hardness was calculated using measured Ca and Mg concentrations. Alkalinity measured as total alkalinity in CaCO3 measured by titration.
Measurements for Ca, Mg, Na and alkalinity were taken from a bulk test solution sample for each hardness value. pH was measured every 24 h from each test flask, with the mean value reported below.
			n	No. of flasks per test	Major ions (mg/L)			Alkalinity (mg/L)
	Hardness (mg CaCO3 /L)	pH			Ca	Mg	Na
Hardness 5 - pH 6.5	5	6.7	2	25 – 27	0.9	0.6	30	47
Hardness 5 - pH 7.5	5	7.6	2	25 – 27	0.9	0.6	30	47
Hardness 5 - pH 8.5	5	8.3	2	25	0.9	0.6	30	47
Hardness 30 - pH 6.5	31	6.7	2	25	5	4	30	33
Hardness 30 - pH 7.5	31	7.6	2	25	5	4	30	33
Hardness 30 - pH 8.5	31	8.3	2	25 – 27	5	4	30	33
Hardness 90 - pH 6.5	93	6.7	3	33 – 39	15	14	30	39
Hardness 90 - pH 7.5	93	7.6	2	33 – 36	15	14	30	39
Hardness 90 - pH 8.5	93	8.3	3	33 – 45	15	14	30	39
Hardness 400 - pH 6.5	402	6.7	2	25	71	55	30	36
Hardness 400 - pH 7.5	402	7.6	2	25	71	55	30	36
Hardness 400 - pH 8.5	402	8.3	2	25	71	55	30	36

## Sheet: Table S5
Table S5. Results Data Table Summary
Test Name	Number of tests (n)	Data points	Hardness (mg/L)	Temp (°C)	pH	DOC (mg/L)	Ca (mg/L)	Mg (mg/L)	Na (mg/L)	EC10 (µg/L)	SD (µg/L)	EC20 (µg/L)	SD (µg/L)	EC50 (µg/L)	SD (µg/L)
Hardness 5 - pH 6.5	2	53	5.48	27	6.7	0.75	0.9	0.6	30	1.5	0.26761	2.56404	0.35205	8.7	0.77841
Hardness 5 - pH 7.5	2	53	5.48	27	7.6	0.75	0.9	0.6	30	1.8	0.41255	3.54977	0.622782	17	2.13032
Hardness 5 - pH 8.5	2	51	5.48	27	8.3	0.75	0.9	0.6	30	0.85	0.116702	1.54493	0.164228	6.2	0.473332
Hardness 30 - pH 6.5	2	50	30.45	27	6.7	0.5	5	4	30	3.2	0.57342	6.855	0.95302	43	6.02552
Hardness 30 - pH 7.5	2	50	30.45	27	7.6	0.5	5	4	30	2.1	0.39403	4.71998	0.70511	32	4.03777
Hardness 30 - pH 8.5	2	52	30.45	27	8.3	0.5	5	4	30	1.3	0.18471	2.62482	0.28293	13	1.02824
Hardness 90 - pH 6.5	3	107	92.9	27	6.7	0.66	15.1	13.8	30	4.5	0.888311	13.7022	1.89759	184.634	23.1814
Hardness 90 - pH 7.5	2	69	93.8	27	7.6	0.6	15.3	13.5	30	0.79	0.150244	5.8423	0.720461	119.699	7.64459
Hardness 90 - pH 8.5	3	111	92.9	27	8.3	0.69	15.2	13.3	30	3.2	0.303447	9.76864	0.621708	52.739	1.7702
Hardness 400 - pH 6.5	2	50	401.7	27	6.7	0.49	71	55	30	5.3	0.48965	11.5184	0.76359	96	14.8474
Hardness 400 - pH 7.5	2	50	401.7	27	7.6	0.49	71	55	30	4.4	1.29971	12.7659	2.86002	159	25.7944
Hardness 400 - pH 8.5	2	50	401.7	27	8.3	0.49	71	55	30	3.9	0.746282	11.3854	1.52161	59	3.95833

## Sheet: Table S6
Table S6. Stepwise regression analysis output for testing for interactive terms between hardness and pH. Input code is in bold.
EC10
#Full linear model output prior to stepwise regression
> Chlr_int_EC10 <- lm(ltox ~ ph + lhard + lhard:ph, data = df_EC10)
> summary(Chlr_int_EC10)
Call:
lm(formula = ltox ~ ph + lhard + lhard:ph, data = df_EC10)
Residuals:
Min 1Q Median 3Q Max
-1.21358 -0.15247 0.07861 0.31629 0.51099
Coefficients:
Estimate Std. Error t value Pr(>|t|)
(Intercept) 2.10074 3.93395 0.534 0.604
ph -0.31769 0.52869 -0.601 0.560
lhard 0.08191 0.95699 0.086 0.933
ph:lhard 0.02667 0.12797 0.208 0.839
Residual standard error: 0.4972 on 11 degrees of freedom
Multiple R-squared: 0.5268,	Adjusted R-squared: 0.3977
F-statistic: 4.081 on 3 and 11 DF, p-value: 0.03564
#Stepwise regression analysis
> Chlr_intaic_EC10 <- stepAIC(Chlr_int_EC10, direction = c("both"))
Start: AIC=-17.62
ltox ~ ph + lhard + lhard:ph
Df Sum of Sq RSS AIC
- ph:lhard 1 0.010736 2.7297 -19.558
<none> 2.7189 -17.617
Step: AIC=-19.56
ltox ~ ph + lhard
Df Sum of Sq RSS AIC
- ph 1 0.27442 3.0041 -20.121
<none> 2.7297 -19.558
+ ph:lhard 1 0.01074 2.7190 -17.617
- lhard 1 2.88503 5.6147 -10.740
Step: AIC=-20.12
ltox ~ lhard
Df Sum of Sq RSS AIC
<none> 3.0041 -20.121
+ ph 1 0.27442 2.7297 -19.558
- lhard 1 2.74120 5.7453 -12.395
> summary(Chlr_intaic_EC10)
Call:
lm(formula = ltox ~ lhard, data = df_EC10)
Residuals:
Min 1Q Median 3Q Max
-1.23024 -0.27105 0.08002 0.34075 0.51818
Coefficients:
Estimate Std. Error t value Pr(>|t|)
(Intercept) -0.24097 0.32669 -0.738 0.47386
lhard 0.27225 0.07905 3.444 0.00436 **
---
Signif. codes: 0 ‘***’ 0.001 ‘**’ 0.01 ‘*’ 0.05 ‘.’ 0.1 ‘ ’ 1
Residual standard error: 0.4807 on 13 degrees of freedom
Multiple R-squared: 0.4771,	Adjusted R-squared: 0.4369
F-statistic: 11.86 on 1 and 13 DF, p-value: 0.004357
EC50
#Full linear model output prior to stepwise regression
> Chlr_int_EC50 <- lm(ltox ~ ph + lhard + lhard:ph, data = df_EC50)
> summary(Chlr_int_EC50)
Call:
lm(formula = ltox ~ ph + lhard + lhard:ph, data = df_EC50)
Residuals:
Min 1Q Median 3Q Max
-1.10825 -0.46254 0.08112 0.62484 0.80390
Coefficients:
Estimate Std. Error t value Pr(>|t|)
(Intercept) 0.3368 5.4728 0.062 0.952
ph 0.1059 0.7355 0.144 0.888
lhard 1.5810 1.3313 1.188 0.260
ph:lhard -0.1211 0.1780 -0.680 0.511
Residual standard error: 0.6916 on 11 degrees of freedom
Multiple R-squared: 0.7671,	Adjusted R-squared: 0.7036
F-statistic: 12.08 on 3 and 11 DF, p-value: 0.0008356
#Stepwise regression analysis
> Chlr_intaic_EC50 <- stepAIC(Chlr_int_EC50, direction = c("both"))
Start: AIC=-7.71
ltox ~ ph + lhard + lhard:ph
Df Sum of Sq RSS AIC
- ph:lhard 1 0.22118 5.4833 -9.0950
<none> 5.2622 -7.7126
Step: AIC=-9.1
ltox ~ ph + lhard
Df Sum of Sq RSS AIC
- ph 1 0.7402 6.2235 -9.1957
<none> 5.4833 -9.0950
+ ph:lhard 1 0.2212 5.2622 -7.7126
- lhard 1 16.8969 22.3802 10.0019
Step: AIC=-9.2
ltox ~ lhard
Df Sum of Sq RSS AIC
<none> 6.2235 -9.1957
+ ph 1 0.7402 5.4833 -9.0950
- lhard 1 16.3731 22.5967 8.1463
> summary(Chlr_intaic_EC50)
Call:
lm(formula = ltox ~ lhard, data = df_EC50)
Residuals:
Min 1Q Median 3Q Max
-1.07902 -0.49058 -0.05914 0.59486 1.05056
Coefficients:
Estimate Std. Error t value Pr(>|t|)
(Intercept) 1.1519 0.4702 2.450 0.0292 *
lhard 0.6654 0.1138 5.848 5.7e-05 ***
---
Signif. codes: 0 ‘***’ 0.001 ‘**’ 0.01 ‘*’ 0.05 ‘.’ 0.1 ‘ ’ 1
Residual standard error: 0.6919 on 13 degrees of freedom
Multiple R-squared: 0.7246,	Adjusted R-squared: 0.7034
F-statistic: 34.2 on 1 and 13 DF, p-value: 5.703e-05

## Sheet: Table S7
Table S7. WHAM predicted zinc species distribution
		Species	Zn2+		ZnOH+		Zn(OH)2		ZnSO4		ZnCO3		ZnCl+		ZnHCO3+
	Hardness (mg CaCO3 /L)	pH	Average (%)	Std. Dev.	Average (%)	Std. Dev.	Average (%)	Std. Dev.	Average (%)	Std. Dev.	Average (%)	Std. Dev.	Average (%)	Std. Dev.	Average (%)	Std. Dev.
Hardness 5 - pH 6.5	5	6.7	68.3	0.1	0.4	0	0	0	0.6	0	0.6	0	0	0	30	0
Hardness 5 - pH 7.5	5	7.6	56.6	0.1	2.6	0	1.3	0	0.5	0	5.6	0	0	0	33.4	0.1
Hardness 5 - pH 8.5	5	8.3	34	0	7.7	0	20	0	0.3	0	17.3	0	0	0	20.7	0
Hardness 30 - pH 6.5	31	6.7	67.7	0	0.4	0	0	0	2.8	0	0.6	0	0	0	28.5	0
Hardness 30 - pH 7.5	31	7.6	56.6	0.1	2.5	0	1.3	0	2.3	0	5.3	0	0	0	32	0
Hardness 30 - pH 8.5	31	8.3	34.6	0	7.6	0	19.5	0	1.4	0	16.6	0	0	0	20.2	0
Hardness 90 - pH 6.5	93	6.7	61.8	2.5	0.306955	0.0167306	0.018219	0.00171608	6.85315	0.269932	0.451324	0.017557	0.0064189	0.000255096	23.7801	0.925982
Hardness 90 - pH 7.5	93	7.6	50.7575	3.60016	1.87628	0.144678	0.829076	0.0859237	5.5432	0.387737	4.14571	0.285392	0.00519205	0.000364815	25.6871	1.76907
Hardness 90 - pH 8.5	93	8.3	30.7776	2.39941	6.67191	0.519691	17.2923	1.70988	3.40447	0.26181	13.7034	1.02803	0.00318758	0.000245311	16.5585	1.24234
Hardness 400 - pH 6.5	402	6.7	61.4	0.1	0.3	0	0	0	17.4	0	0.4	0	0	0	20.5	0
Hardness 400 - pH 7.5	402	7.6	54.3	0.1	2	0	1	0	15.3	0	3.7	0	0	0	23.8	0.1
Hardness 400 - pH 8.5	402	8.3	37	0	6.9	0	16.6	0	10.5	0	12.6	0	0	0	16.4	0
